# Supplementary material for: Farmer crop choice impacts soil chemical and physical properties in the major agricultural districts of the Yellow River Basin
Source: Research Square preprint supplement (doi:10.21203/rs.3.rs-8433803/v1), 2026-02-07
Supplement: Supplementary file 1 [file ff273a441ce26ef76ee1ac35.docx]

**Dry soil aggregate stability** **in the Hetao Plain of the Yellow River influenced by soil type, crop rotation, irrigation, and fertilizer treatment**

Huawei Pi1,2, Sisi Li*1,2, Jinrong Li1*, Jianying Guo1

1Yinshanbeilu Grassland Eco-Hydrology National Observation and Research Station, China Institute of Water Resources and Hydropower Research, Hohhot 010020, China

2Key Research Institute of Yellow River Civilization and Sustainable Development & Collaborative Innovation Center for Yellow River Civilization, Henan University, China.

*Corresponding author: Sisi Li and Jinrong Li

Email: [liss.16b@igsnrr.ac.cn](mailto:liss.16b@igsnrr.ac.cn)

**Contents of this file**

1. Table S1.

Table S1: Field interview’s table with local land managers or farmers were to investigate crop rotation, tillage, irrigation, and fertilizer treatment.

1. Basic Information

| Investigator | Survey Date | Province, City, County | Location (Latitude, Longitude) | Interviewee (land managers or farmers) |
| --- | --- | --- | --- | --- |
|  |  |  |  |  |

1. Land Use Information

| Land Use Type | Winter Wheat, Fallow Land, Tilled (unknown crop), Other: |
| --- | --- |
| Plot Size |  |
| Formation Time | Unknown: Detailed date: Other: |
| Productivity of land | High ▢ middle ▢ low ▢ Poor ▢ Desertification ▢ |
| Tillage Practice | Conventional Tillage：no-tillage: Unknown： Other:  Tillage detail (if applicable): depth, frequency, type of blades, etc., |
| Irrigation Method | Broad irrigation: Drip irrigation under plastic film:  Dryland farming： Other: Dosage (if applicable): |
| Fertilization | Synthetic fertilizer： manure：   No fertilization： Other： Dosage (if applicable): |
| Soil bulk | Sampling |
| Surface water content | Sampling |
| Take field photos |  |

1. Plot Vegetation, soil surface Information (Line-point intercept method)

| Point | meter | Type1 | Height (cm) | Main stem diameter (mm) | Canopy length & width (cm) | Number of branches |  |
| --- | --- | --- | --- | --- | --- | --- | --- |
| 1 |  |  |  |  |  |  |  |
| 2 |  |  |  |  |  |  |  |
| 3 |  |  |  |  |  |  |  |
| 4 |  |  |  |  |  |  |  |
| 5 |  |  |  |  |  |  |  |
| 6 |  |  |  |  |  |  |  |
| 7 |  |  |  |  |  |  |  |
| 8 |  |  |  |  |  |  |  |
| 9 |  |  |  |  |  |  |  |
| 10 |  |  |  |  |  |  |  |

1Type includes: Vegetation, Crust, Stone.

1. Vegetation**:** ① Residue or living plant? ② Overall height, main stem diameter (mm), ③ Canopy length and width, ④ Number of leaves on branch 1, record diameter of 3 leaves. ⑤ Number of leaves on branch 2, record diameter of 3 leaves. ⑥ Record total number of branches.
2. Crust: Surface crust fraction, crust thickness, Crust fraction with loose material, Loose mass on crust, Take several crust samples.
3. Stone: Size (if applicable).
